# Supplementary material
Source: ML conference proceedings conference paper supplement (https://openreview.net/forum?id=RhRLbCt7MS)
Supplement: supplementary_material [file slides-v2.pdf › THIS-ODE-main/images/slides-v2.pdf]

# Decomposing Temporal High-Order Interactions via Latent ODEs

Shibo Li, Robert M. Kirby *and* Shandian Zhe

School of Computing, University of Utah

Presenter: Shibo Li

shibo@cs.utah.edu

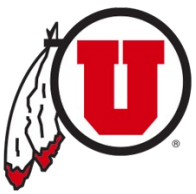

# Background

- (High-order) Interactions in Real-world

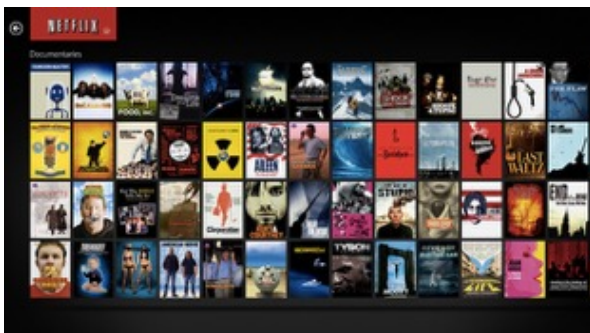

(user, movie, episode)

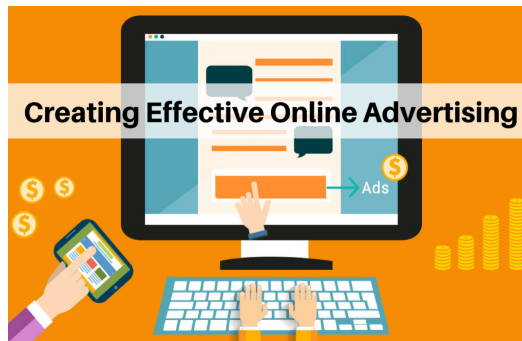

(user, advertisement, page-section)

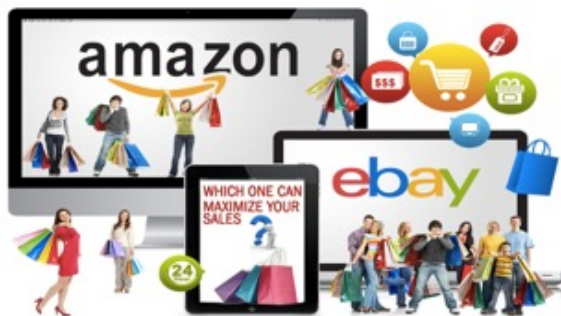

(user, item, online-store)

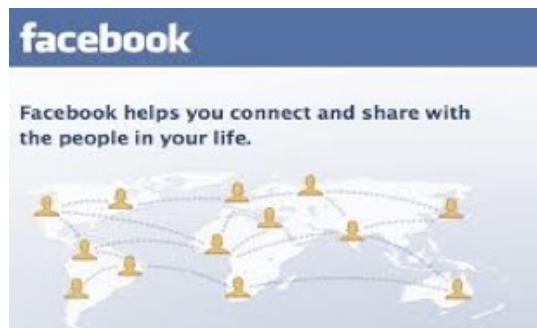

(user, user, location, message-type)

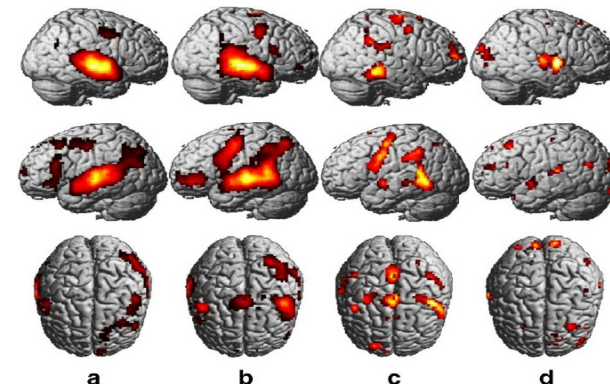

(subject, voxel, electrode)

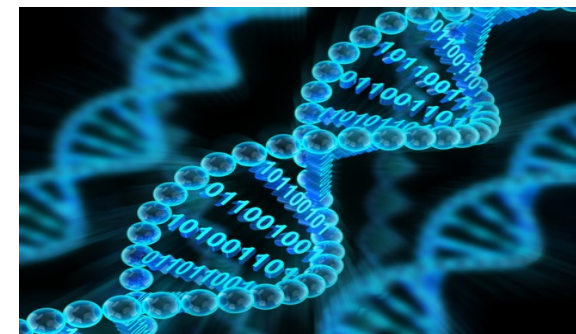

(patient, gene, condition)

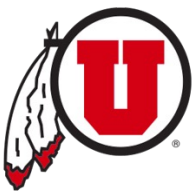

# Background

- Tensor Decomposition

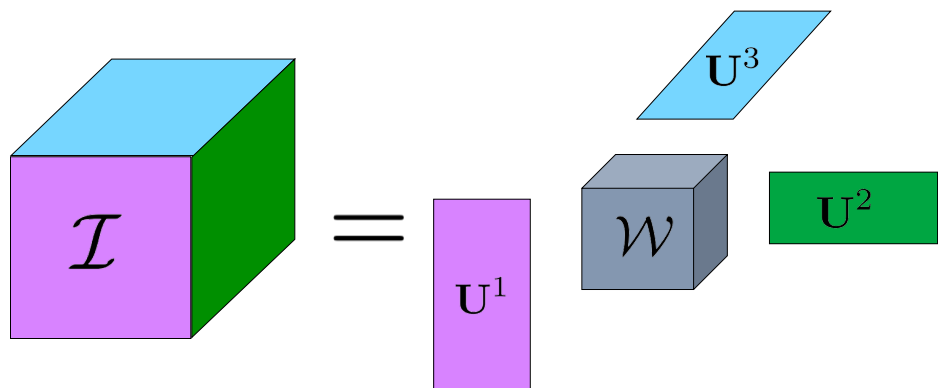

$$\overset{d_1 \times \dots \times d_K}{\mathcal{I}} = \underset{r_1 \times \dots \times r_K}{\mathcal{W}} \times_1 \underset{d_1 \times r_1}{\mathbf{U}^1} \times_2 \dots \times_K \underset{d_K \times r_K}{\mathbf{U}^K}$$

Tucker, 1966

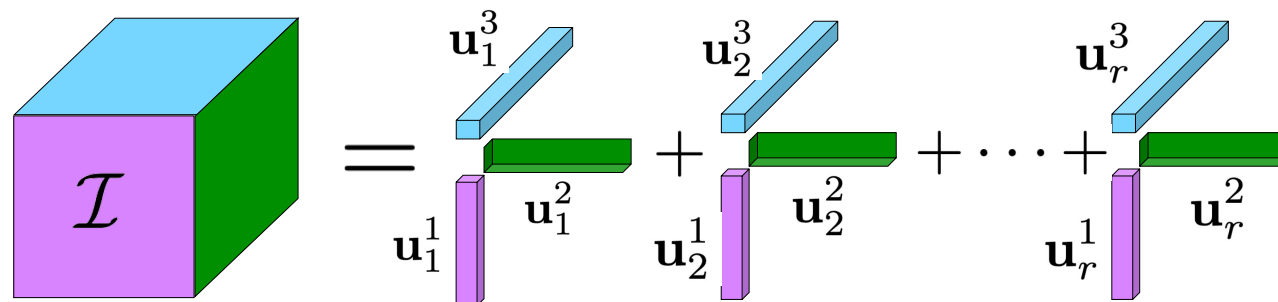

$$\mathcal{I} = \sum_{j=1}^r \lambda_j \cdot \mathbf{U}^1[:, j] \circ \dots \circ \mathbf{U}^K[:, j]$$

CANDECOMP/PARAFAC (CP), Harshman, 1970



# Motivation

- Temporal Interactions  $\mathcal{I}(t)$

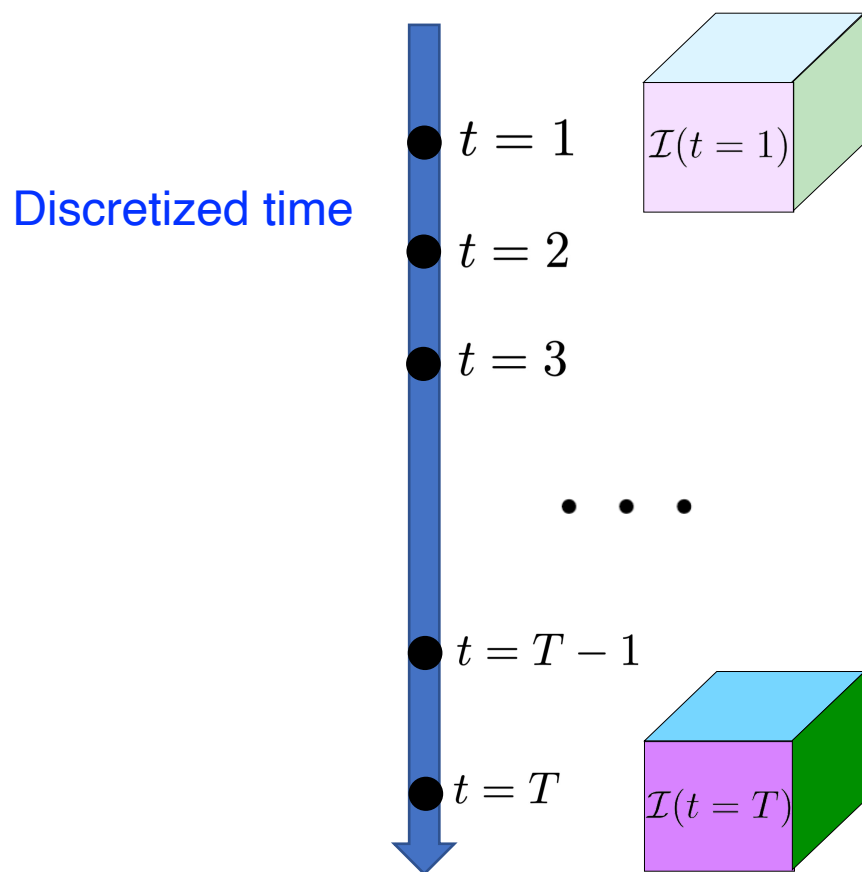

## Our Contribution:

- THIS-ODE**: A novel decomposing model of temporal high-order interactions.
- Leverage continuous timestamps, capture all kinds of complex temporal dynamics within interactions.
- Tractable inference with forward sensitivity analysis and time alignment/integral transform tricks.

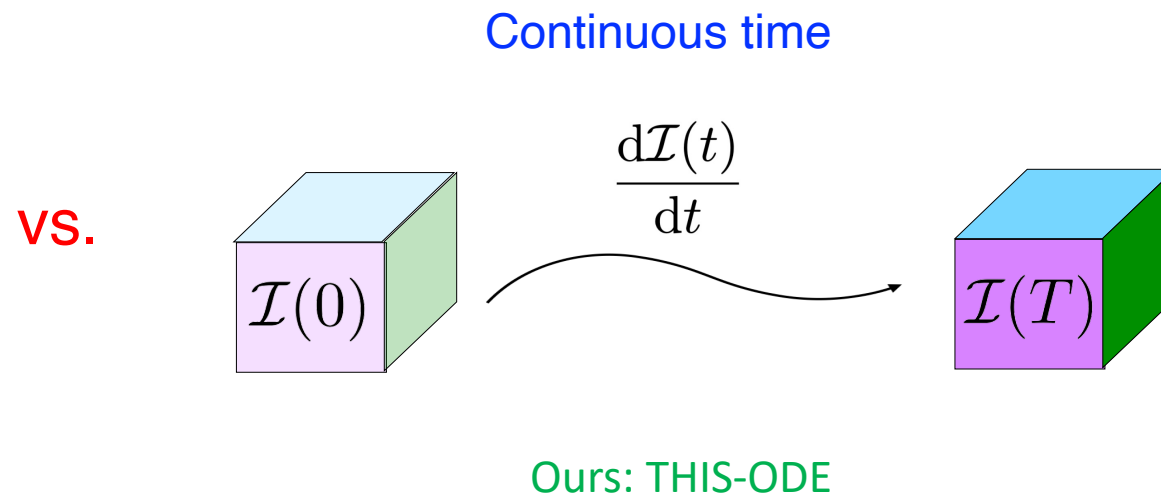



# Method

- Temporal interaction as parametric latent ODE

$$\begin{cases} \frac{dm_{\mathbf{i}}(t)}{dt} = f(m_{\mathbf{i}}(t), \mathbf{v}_{\mathbf{i}}, t) & \text{Dynamics} \\ m_{\mathbf{i}}(0) = \beta(\mathbf{v}_{\mathbf{i}}) & \text{I.C.} \end{cases} \xrightarrow{\text{ODESolve}} m_{\mathbf{i}}(t) = m_{\mathbf{i}}(0) + \int_0^t f_{\boldsymbol{\theta}}(m_{\mathbf{i}}(s), \mathbf{v}_{\mathbf{i}}, s) ds$$

- Joint probability given  $\mathcal{D} = \{(\mathbf{i}_1, t_1, y_1), \dots, (\mathbf{i}_N, t_N, y_N)\}$

$$p(\mathcal{U}, \nu, \mathcal{D} | \boldsymbol{\theta}) = \prod_{k=1}^K \prod_{j=1}^{d_k} \mathcal{N}(\mathbf{u}_j^k | \mathbf{0}, \mathbf{I}) \cdot \text{Gam}(\nu | a_0, b_0) \cdot \prod_{n=1}^N \mathcal{N}(y_n | m_{\mathbf{i}_n}(t_n), \nu^{-1})$$

Prior of representations      Prior noise precision      Probability of noisy observations

Note: the ODE parameters are implicitly located in the probability of observations



# Method

- Why not auto-differentiation?

$$p(\mathcal{U}, \nu, \mathcal{D} | \boldsymbol{\theta}) = \prod_{k=1}^K \prod_{j=1}^{d_k} \mathcal{N}(\mathbf{u}_j^k | \mathbf{0}, \mathbf{I}) \cdot \text{Gam}(\nu | a_0, b_0) \cdot \prod_{n=1}^N \mathcal{N}(y_n | m_{\mathbf{i}_n}(t_n), \nu^{-1})$$

$$m_{\mathbf{i}}(t) = m_{\mathbf{i}}(0) + \int_0^t f_{\boldsymbol{\theta}}(m_{\mathbf{i}}(s), \mathbf{v}_{\mathbf{i}}, s) ds$$

Computational graph constructed by ODE solvers

Given by ODE solvers

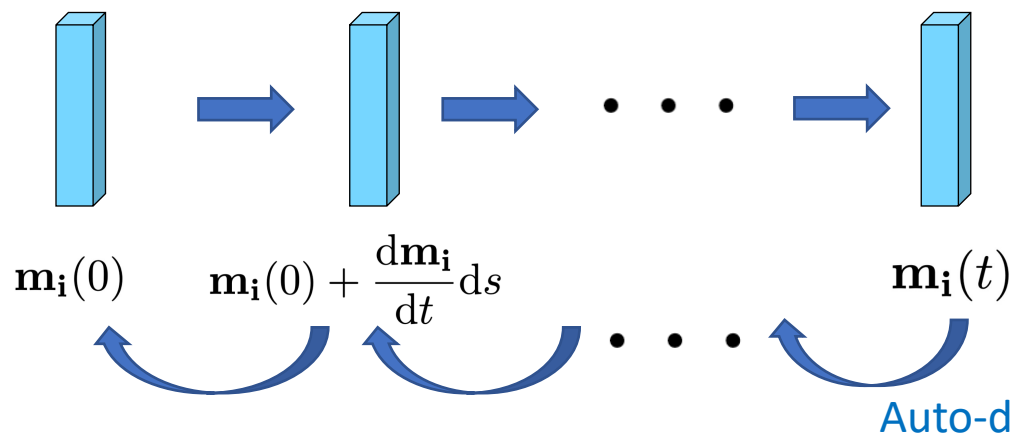

All the intermedia states needs to be saved to compute the gradients

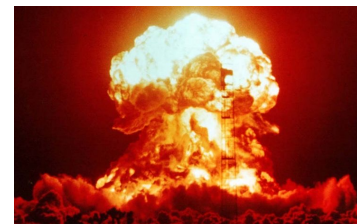



# Algorithm

- Efficient computation of gradients with **Forward Sensitivity**

$$\mathbf{z}_i = [m_i^0; \boldsymbol{\eta}]$$

$$\begin{aligned} \text{Then } \mathbf{s}_i(t) &= \frac{\partial m_i(t)}{\partial \mathbf{z}_i} \\ &= \left[ \frac{\partial m_i(t)}{\partial m_i^0}; \frac{\partial m_i(t)}{\partial \boldsymbol{\eta}} \right] \end{aligned}$$

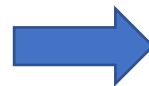

ODE of system sensitivity

$$\begin{cases} \frac{d\mathbf{s}_i(t)}{dt} = \frac{\partial f}{\partial m_i(t)} \mathbf{s}_i(t) + \frac{\partial f}{\partial \mathbf{z}_i} \\ \mathbf{s}_i(0) = \frac{dm_i^0}{d\mathbf{z}_i}, \end{cases}$$

- Time alignment** for efficient stochastic mini-batch optimization

$$\mathbf{h}_{i_l}(t_l) = \mathbf{h}_{i_l}(0) + \int_0^{t_l} \boldsymbol{\alpha}(\mathbf{h}_{i_l}(\tau), \tau) d\tau = \mathbf{h}_{i_l}(0) + \int_0^{t_e} \frac{t_l}{t_e} \boldsymbol{\alpha}\left(\mathbf{h}_{i_l}\left(\frac{t_l}{t_e}s\right), \frac{t_l}{t_e}s\right) ds$$

$$\mathbf{h}_i(t) = [m_i(t); \mathbf{s}_i(t)]$$



# Algorithm

- The bird view

- Depends on current state solution only
- Jointly solved with the system state with **only one ODE solver and forward pass**

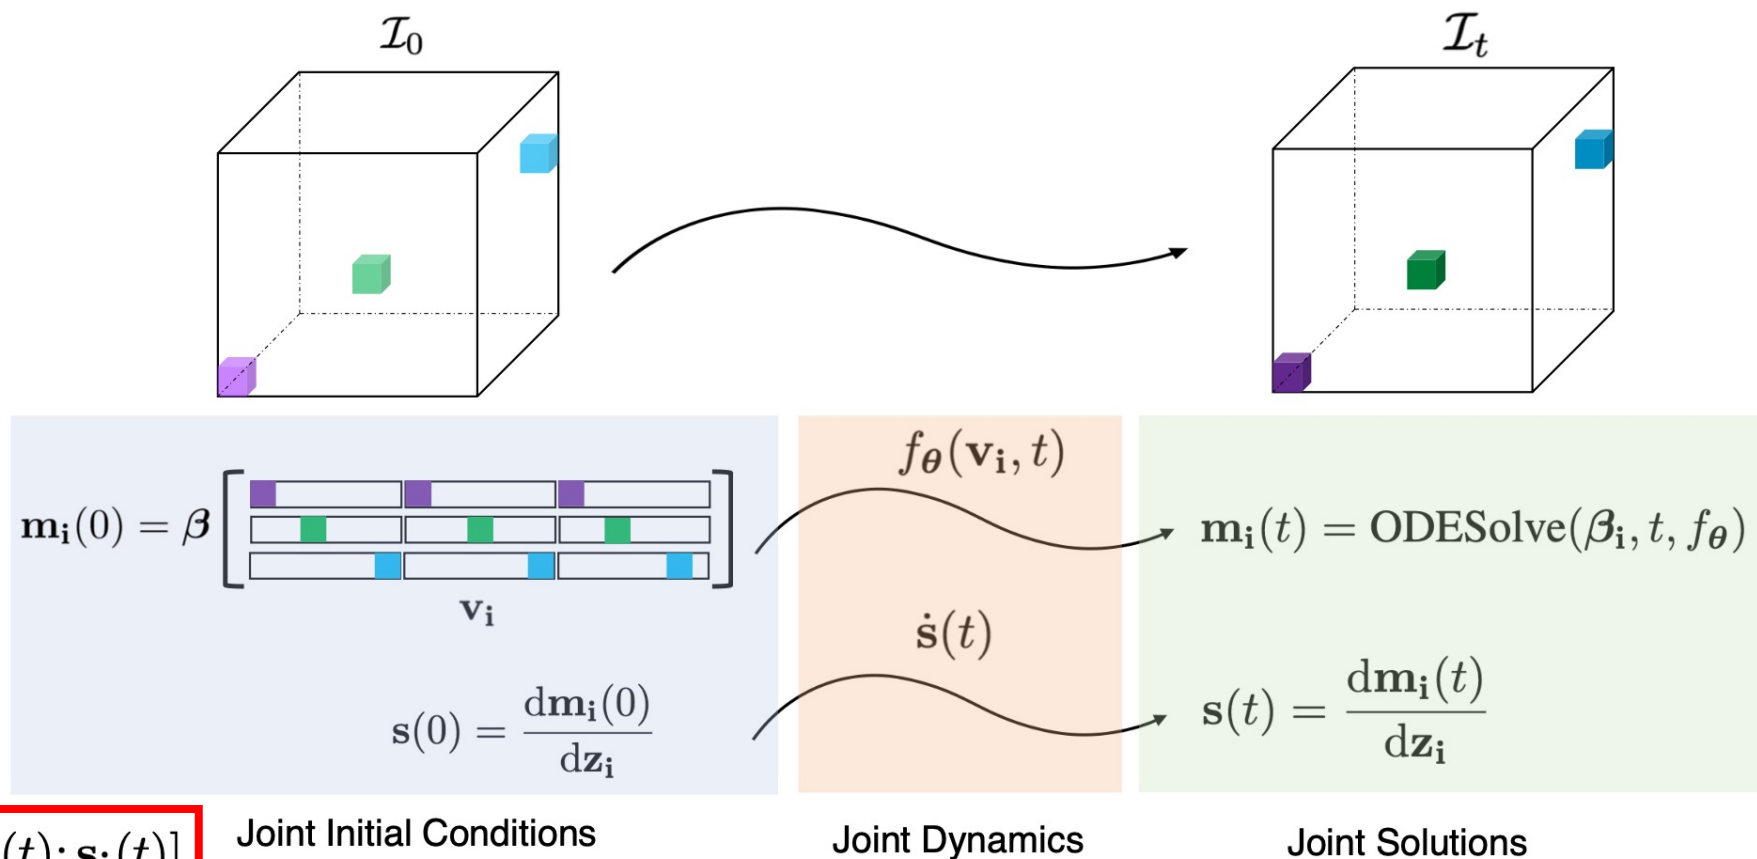

$$\mathbf{h}_i(t) = [\mathbf{m}_i(t); \mathbf{s}_i(t)]$$

Joint Initial Conditions

Joint Dynamics

Joint Solutions



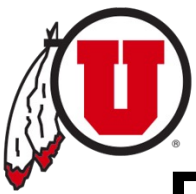

# Experiment

## • Ablation Study: Spiral Interactions

$$m_i(t) = (u_{i_1}^1 \exp(-0.5t))^{\mathbb{1}(i_1+i_2 \bmod 2=0)} \cdot (u_{i_2}^2 + 2\pi t)^{\mathbb{1}(i_1+i_2 \bmod 2=1)}$$

Our method

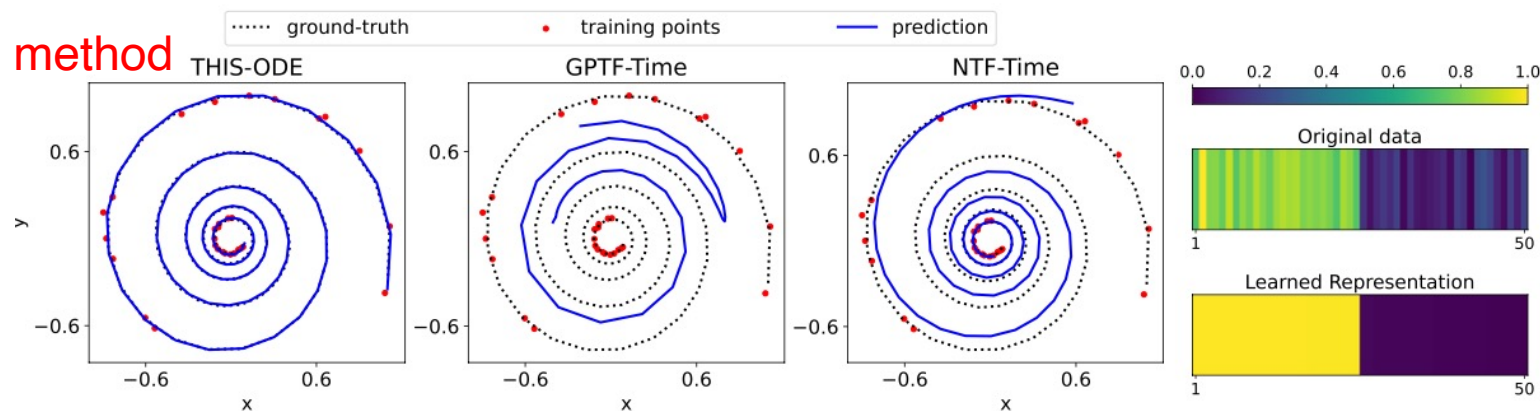

(a) Recovered Spiral in the *interpolation* experiment. Radius:  $m_{(2,2)}(t)$ ; Angle:  $m_{(1,2)}(t)$ .

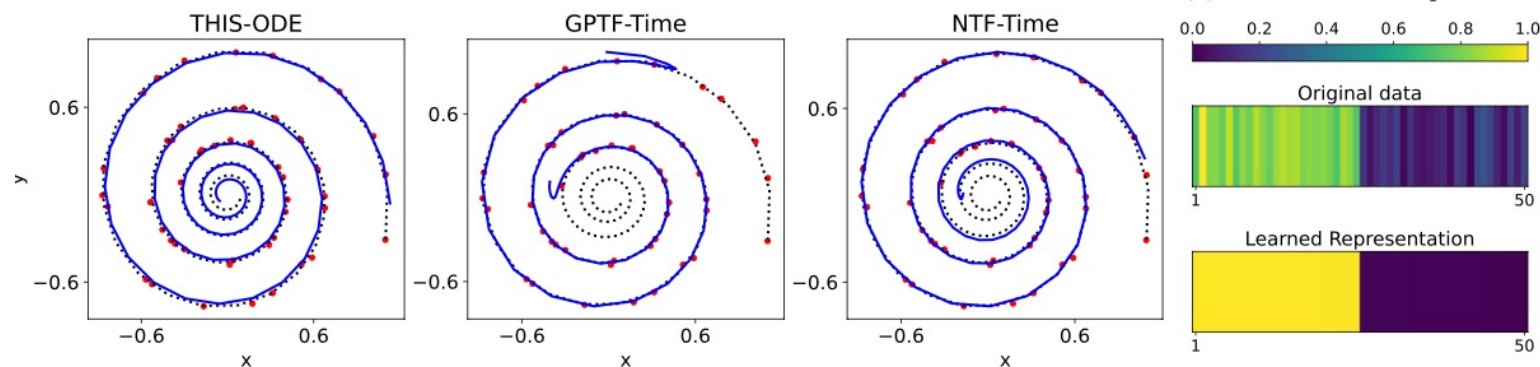

(b) Structures in *interpolation*.



(c) Recovered Spiral in the *extrapolation* experiment. Radius:  $m_{(2,2)}(t)$ ; Angle:  $m_{(1,2)}(t)$ .

(d) Structures in *extrapolation*.

|                 | Interpolation | Extrapolation |
|-----------------|---------------|---------------|
| GPTF-Time       | 0.5557        | 0.9032        |
| NTF-Time        | 0.1004        | 0.3656        |
| <b>THIS-ODE</b> | <b>0.0148</b> | <b>0.0746</b> |

Our method



# Experiment

- Real-world applications: *Beijing Air*, *Indoor Condition*, *Server Room*, *Fit Record*

| Name                | Description                   | Size           | NNZ     | Granularity in Time |
|---------------------|-------------------------------|----------------|---------|---------------------|
| Beijing Air Quality | time x locations x pollutants | 35064 x 12 x 6 | 2454305 | hourly              |
| Indoor Condition    | time x locations x sensor     | 19735 x 9 x 2  | 241201  | every 10 minutes    |

| Interpolation | <i>Beijing Air</i>                  | <i>Indoor Condition</i>             | Extrapolation |                                     |                                     |
|---------------|-------------------------------------|-------------------------------------|---------------|-------------------------------------|-------------------------------------|
| CP-Time       | $0.897 \pm 0.012$                   | $0.780 \pm 0.012$                   | CP-Time       | $0.863 \pm 0.022$                   | $0.867 \pm 0.010$                   |
| CP-DTL        | $0.898 \pm 0.015$                   | $0.842 \pm 0.003$                   | CP-DTL        | $0.553 \pm 0.005$                   | $0.527 \pm 0.006$                   |
| CP-DTN        | $0.833 \pm 0.003$                   | $0.889 \pm 0.005$                   | CP-DTN        | $0.557 \pm 0.004$                   | $0.584 \pm 0.009$                   |
| GPTF-Time     | $0.711 \pm 0.011$                   | $0.849 \pm 0.005$                   | GPTF-Time     | $0.527 \pm 0.018$                   | $0.489 \pm 0.011$                   |
| GPTF-DTL      | $0.686 \pm 0.045$                   | $0.852 \pm 0.004$                   | GPTF-DTL      | $0.577 \pm 0.035$                   | $0.506 \pm 0.013$                   |
| GPTF-DTN      | $0.670 \pm 0.062$                   | $0.713 \pm 0.104$                   | GPTF-DTN      | $0.511 \pm 0.002$                   | $0.489 \pm 0.003$                   |
| NTF-Time      | $0.745 \pm 0.095$                   | $0.800 \pm 0.009$                   | NTF-Time      | $0.537 \pm 0.002$                   | $0.510 \pm 0.027$                   |
| NTF-DTL       | $0.757 \pm 0.006$                   | $0.777 \pm 0.018$                   | NTF-DTL       | $0.512 \pm 0.009$                   | $0.593 \pm 0.079$                   |
| NTF-DTN       | $0.686 \pm 0.011$                   | $0.665 \pm 0.004$                   | NTF-DTN       | $0.513 \pm 0.003$                   | $0.484 \pm 0.011$                   |
| PTucker       | $0.959 \pm 0.015$                   | $0.806 \pm 0.027$                   | PTucker       | $0.522 \pm 0.022$                   | $0.749 \pm 0.006$                   |
| THIS-ODE      | <b><math>0.624 \pm 0.008</math></b> | <b><math>0.618 \pm 0.007</math></b> | THIS-ODE      | <b><math>0.498 \pm 0.013</math></b> | <b><math>0.460 \pm 0.004</math></b> |

Our method

# Welcome to our poster!

Shibo Li (shibo@cs.utah.edu)
